# Supplementary material
Source: publisher site journal article supplement (https://www.dovepress.com/article/275992)
Supplement: Supplementary file 1 [file get_supplementary_file.php]

**Supplementary Material**

**Supplementary text S1**

**Radiopharmaceutical**: 2 mCi of Tc99m HIDA was injected I.V.
**Technique**: 1-minute dynamic liver uptake was obtained for one hour. Delayed dynamic images for the liver were obtained 2 hours afterward.
**Findings**:
- There is prompt liver uptake of tracer with complete absence of cardiac activity in about 5 minutes; indicative of normal hepatocellular function.
- There is biliary to bowel transit with visualization of bowel activity on early and on delayed images excluding biliary atresia.
**Conclusion**: normal biliary to bowel transit with no conclusive evidence of biliary atresia.
